# Supplementary material for: Incidence of Neonatal Developmental Dysplasia of the Hip and Late Detection Rates Based on Screening Strategy: A Systematic Review and Meta-analysis
Source: PubMed Central journal article supplement (PMC9389349; doi:10.1001/jamanetworkopen.2022.27638), 2022-08-18
Supplement: jamanetwopen-e2227638-s001.pdf [file jamanetwopen-e2227638-s001.pdf]

## Supplemental Online Content

Kuitunen I, Uimonen MM, Haapanen M, Sund R, Helenius I, Ponkilainen VT. Incidence of neonatal developmental dysplasia of the hip and late detection rates based on screening strategy: a systematic review and meta-analysis. *JAMA Netw Open*. 2022;5(8):e2227638. doi:10.1001/jamanetworkopen.2022.27638

**eFigure 1.** Search Strategy and PRISMA Flowchart of the Review Process for Randomized Controlled Trials

**eFigure 2.** Overall Risk of Bias Summary Figure for Assessed Domains

**eTable 1.** Modified PRISMA Flowchart of the Screening Process

**eTable 2.** Background Characteristics of the Included Studies

**eTable 3.** Risk of Bias Assessment of the Individual Studies Based on the Joanna Briggs Institute Critical Appraisal Tool for Prevalence Studies

This supplemental material has been provided by the authors to give readers additional information about their work.

**eFigure 1.** Search Strategy and PRISMA Flowchart of the Review Process for Randomized Controlled Trials

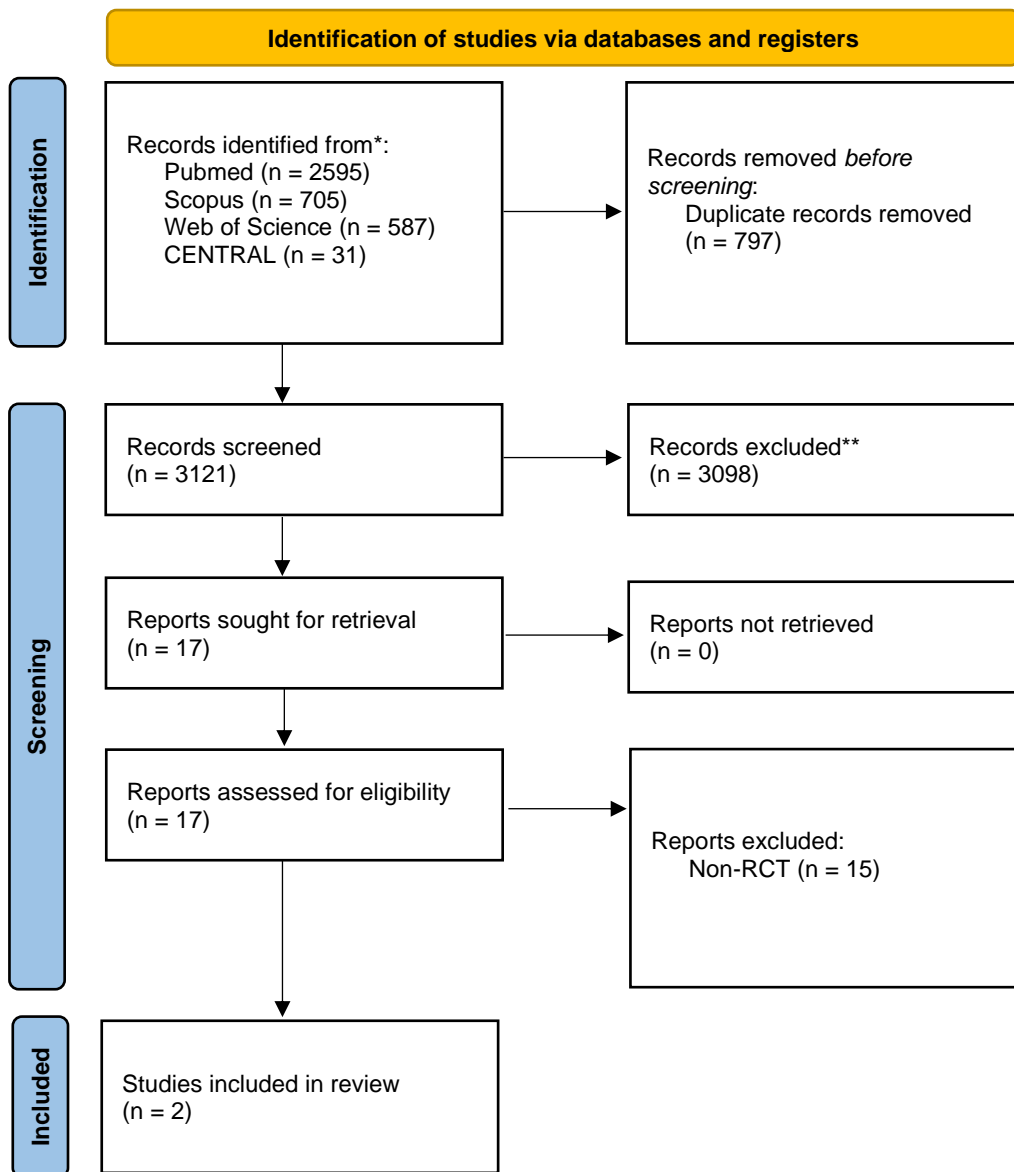

As none of these records were novel to the Cochrane review in 2013, we decided not to conduct synthesis of these studies as replication was not needed.

**Search strategy:**

Following search term was used: (hip) AND (ultrasound) AND (luxation or dysplasia) AND (newborn or neonate or congenital)

Following databases were searched: PubMed, Scopus, Web of Science, CENTRAL.

Date of search: November 16<sup>th</sup>, 2021.

**eFigure 2.** Overall Risk of Bias Summary Figure for Assessed Domains

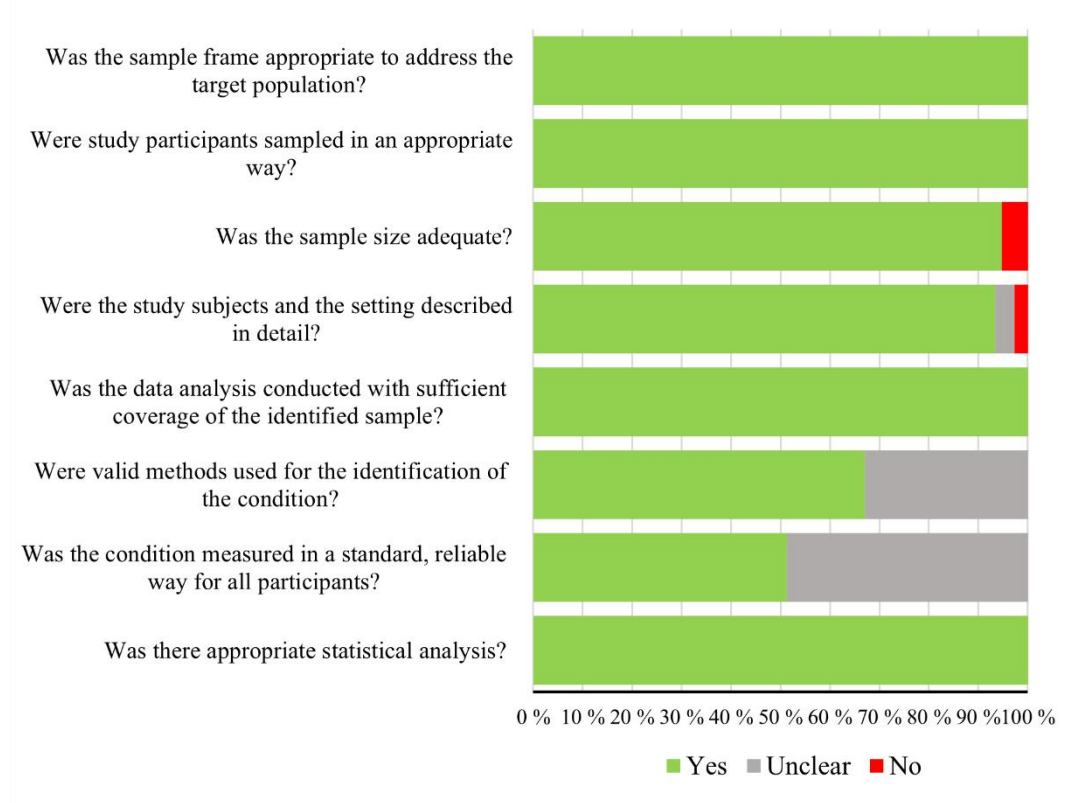

**eTable 1.** Modified PRISMA Flowchart of the Screening Process

| #  | Country                | Date of search | Results retrieved | Duplicates removed | Abstracts screened | Records excluded | Full texts assessed | Reports excluded | Studies included for review |
|----|------------------------|----------------|-------------------|--------------------|--------------------|------------------|---------------------|------------------|-----------------------------|
| 1  | Afghanistan            | 25.11.2021     | 0                 | 0                  | 0                  | 0                | 0                   | 0                | 0                           |
| 2  | Albania                | 25.11.2021     | 0                 | 0                  | 0                  | 0                | 0                   | 0                | 0                           |
| 3  | Algeria                | 25.11.2021     | 1                 | 0                  | 1                  | 1                | 0                   | 0                | 0                           |
| 4  | Andorra                | 25.11.2021     | 0                 | 0                  | 0                  | 0                | 0                   | 0                | 0                           |
| 5  | Angola                 | 25.11.2021     | 0                 | 0                  | 0                  | 0                | 0                   | 0                | 0                           |
| 6  | Antigua and Barbuda    | 25.11.2021     | 0                 | 0                  | 0                  | 0                | 0                   | 0                | 0                           |
| 7  | Argentina              | 25.11.2021     | 3                 | 0                  | 3                  | 3                | 0                   | 0                | 0                           |
| 8  | Armenia                | 25.11.2021     | 0                 | 0                  | 0                  | 0                | 0                   | 0                | 0                           |
| 9  | Australia              | 25.11.2021     | 51                | 7                  | 44                 | 37               | 7                   | 1                | 6                           |
| 10 | Austria                | 25.11.2021     | 16                | 1                  | 15                 | 8                | 7                   | 5                | 2                           |
| 11 | Azerbaijan             | 25.11.2021     | 0                 | 0                  | 0                  | 0                | 0                   | 0                | 0                           |
| 12 | Bahamas                | 25.11.2021     | 0                 | 0                  | 0                  | 0                | 0                   | 0                | 0                           |
| 13 | Bahrain                | 25.11.2021     | 0                 | 0                  | 0                  | 0                | 0                   | 0                | 0                           |
| 14 | Bangladesh             | 25.11.2021     | 2                 | 1                  | 1                  | 1                | 0                   | 0                | 0                           |
| 15 | Barbados               | 25.11.2021     | 0                 | 0                  | 0                  | 0                | 0                   | 0                | 0                           |
| 16 | Belarus                | 25.11.2021     | 0                 | 0                  | 0                  | 0                | 0                   | 0                | 0                           |
| 17 | Belgium                | 25.11.2021     | 12                | 1                  | 11                 | 11               | 0                   | 0                | 0                           |
| 18 | Belize                 | 25.11.2021     | 0                 | 0                  | 0                  | 0                | 0                   | 0                | 0                           |
| 19 | Benin                  | 25.11.2021     | 0                 | 0                  | 0                  | 0                | 0                   | 0                | 0                           |
| 20 | Bhutan                 | 25.11.2021     | 0                 | 0                  | 0                  | 0                | 0                   | 0                | 0                           |
| 21 | Bolivia                | 25.11.2021     | 0                 | 0                  | 0                  | 0                | 0                   | 0                | 0                           |
| 22 | Bosnia and Herzegovina | 25.11.2021     | 2                 | 0                  | 2                  | 1                | 1                   | 0                | 1                           |

|    |                                  |            |     |   |     |     |   |   |   |
|----|----------------------------------|------------|-----|---|-----|-----|---|---|---|
| 23 | Botswana                         | 25.11.2021 | 0   | 0 | 0   | 0   | 0 | 0 | 0 |
| 24 | Brazil                           | 25.11.2021 | 14  | 1 | 13  | 13  | 0 | 0 | 0 |
| 25 | Brunei                           | 25.11.2021 | 0   | 0 | 0   | 0   | 0 | 0 | 0 |
| 26 | Bulgaria                         | 25.11.2021 | 2   | 0 | 2   | 1   | 1 | 1 | 0 |
| 27 | Burkina Faso                     | 25.11.2021 | 2   | 1 | 1   | 1   | 0 | 0 | 0 |
| 28 | Burundi                          | 25.11.2021 | 0   | 0 | 0   | 0   | 0 | 0 | 0 |
| 29 | Côte d'Ivoire                    | 25.11.2021 | 0   | 0 | 0   | 0   | 0 | 0 | 0 |
| 30 | Cabo Verde                       | 25.11.2021 | 0   | 0 | 0   | 0   | 0 | 0 | 0 |
| 31 | Cambodia                         | 25.11.2021 | 0   | 0 | 0   | 0   | 0 | 0 | 0 |
| 32 | Cameroon                         | 25.11.2021 | 0   | 0 | 0   | 0   | 0 | 0 | 0 |
| 33 | Canada                           | 25.11.2021 | 34  | 2 | 32  | 31  | 1 | 0 | 1 |
| 34 | Central African Republic         | 25.11.2021 | 0   | 0 | 0   | 0   | 0 | 0 | 0 |
| 35 | Chad                             | 25.11.2021 | 0   | 0 | 0   | 0   | 0 | 0 | 0 |
| 36 | Chile                            | 25.11.2021 | 7   | 2 | 5   | 4   | 1 | 0 | 1 |
| 37 | China                            | 25.11.2021 | 121 | 7 | 114 | 110 | 4 | 3 | 1 |
| 38 | Colombia                         | 25.11.2021 | 3   | 1 | 2   | 2   | 0 | 0 | 0 |
| 39 | Comoros                          | 25.11.2021 | 0   | 0 | 0   | 0   | 0 | 0 | 0 |
| 40 | Congo (Congo-Brazzaville)        | 25.11.2021 | 0   | 0 | 0   | 0   | 0 | 0 | 0 |
| 41 | Costa Rica                       | 25.11.2021 | 0   | 0 | 0   | 0   | 0 | 0 | 0 |
| 42 | Croatia                          | 25.11.2021 | 10  | 1 | 9   | 5   | 4 | 4 | 0 |
| 43 | Cuba                             | 25.11.2021 | 0   | 0 | 0   | 0   | 0 | 0 | 0 |
| 44 | Cyprus                           | 25.11.2021 | 0   | 0 | 0   | 0   | 0 | 0 | 0 |
| 45 | Czechia (Czech Republic)         | 25.11.2021 | 17  | 1 | 16  | 11  | 5 | 4 | 1 |
| 46 | Democratic Republic of the Congo | 25.11.2021 | 0   | 0 | 0   | 0   | 0 | 0 | 0 |
| 47 | Denmark                          | 25.11.2021 | 37  | 6 | 31  | 28  | 3 | 3 | 0 |
| 48 | Djibouti                         | 25.11.2021 | 0   | 0 | 0   | 0   | 0 | 0 | 0 |

|    |                             |            |     |    |     |     |    |    |   |
|----|-----------------------------|------------|-----|----|-----|-----|----|----|---|
| 49 | Dominica                    | 25.11.2021 | 0   | 0  | 0   | 0   | 0  | 0  | 0 |
| 50 | Dominican Republic          | 25.11.2021 | 0   | 0  | 0   | 0   | 0  | 0  | 0 |
| 51 | Ecuador                     | 25.11.2021 | 0   | 0  | 0   | 0   | 0  | 0  | 0 |
| 52 | Egypt                       | 25.11.2021 | 5   | 2  | 3   | 3   | 0  | 0  | 0 |
| 53 | El Salvador                 | 25.11.2021 | 0   | 0  | 0   | 0   | 0  | 0  | 0 |
| 54 | Equatorial Guinea           | 25.11.2021 | 0   | 0  | 0   | 0   | 0  | 0  | 0 |
| 55 | Eritrea                     | 25.11.2021 | 0   | 0  | 0   | 0   | 0  | 0  | 0 |
| 56 | Estonia                     | 25.11.2021 | 0   | 0  | 0   | 0   | 0  | 0  | 0 |
| 57 | Eswatini (fmr. "Swaziland") | 25.11.2021 | 0   | 0  | 0   | 0   | 0  | 0  | 0 |
| 58 | Ethiopia                    | 25.11.2021 | 9   | 3  | 6   | 3   | 3  | 1  | 2 |
| 59 | Fiji                        | 25.11.2021 | 0   | 0  | 0   | 0   | 0  | 0  | 0 |
| 60 | Finland                     | 25.11.2021 | 11  | 1  | 10  | 10  | 0  | 0  | 0 |
| 61 | France                      | 25.11.2021 | 51  | 5  | 46  | 42  | 4  | 3  | 1 |
| 62 | Gabon                       | 26.11.2021 | 0   | 0  | 0   | 0   | 0  | 0  | 0 |
| 63 | Gambia                      | 26.11.2021 | 0   | 0  | 0   | 0   | 0  | 0  | 0 |
| 64 | Georgia                     | 26.11.2021 | 0   | 0  | 0   | 0   | 0  | 0  | 0 |
| 65 | Germany                     | 26.11.2021 | 144 | 18 | 126 | 105 | 21 | 19 | 2 |
| 66 | Ghana                       | 26.11.2021 | 0   | 0  | 0   | 0   | 0  | 0  | 0 |
| 67 | Greece                      | 26.11.2021 | 6   | 1  | 5   | 4   | 1  | 0  | 1 |
| 68 | Grenada                     | 26.11.2021 | 2   | 1  | 1   | 1   | 0  | 0  | 0 |
| 69 | Guatemala                   | 26.11.2021 | 2   | 1  | 1   | 1   | 0  | 0  | 0 |
| 70 | Guinea                      | 26.11.2021 | 0   | 0  | 0   | 0   | 0  | 0  | 0 |
| 71 | Guinea-Bissau               | 26.11.2021 | 0   | 0  | 0   | 0   | 0  | 0  | 0 |
| 72 | Guyana                      | 26.11.2021 | 0   | 0  | 0   | 0   | 0  | 0  | 0 |
| 73 | Haiti                       | 26.11.2021 | 0   | 0  | 0   | 0   | 0  | 0  | 0 |
| 74 | Holy See                    | 26.11.2021 | 0   | 0  | 0   | 0   | 0  | 0  | 0 |
| 75 | Honduras                    | 26.11.2021 | 0   | 0  | 0   | 0   | 0  | 0  | 0 |

|     |               |            |     |    |     |     |    |    |   |
|-----|---------------|------------|-----|----|-----|-----|----|----|---|
| 76  | Hungary       | 26.11.2021 | 15  | 2  | 13  | 10  | 3  | 2  | 1 |
| 77  | Iceland       | 26.11.2021 | 0   | 0  | 0   | 0   | 0  | 0  | 0 |
| 78  | India         | 26.11.2021 | 36  | 5  | 31  | 26  | 5  | 2  | 3 |
| 79  | Indonesia     | 26.11.2021 | 0   | 0  | 0   | 0   | 0  | 0  | 0 |
| 80  | Iran          | 26.11.2021 | 11  | 1  | 10  | 5   | 5  | 0  | 5 |
| 81  | Iraq          | 26.11.2021 | 2   | 0  | 2   | 2   | 0  | 0  | 0 |
| 82  | Ireland       | 26.11.2021 | 39  | 6  | 33  | 22  | 11 | 7  | 4 |
| 83  | Israel        | 26.11.2021 | 15  | 2  | 13  | 7   | 6  | 3  | 3 |
| 84  | Italy         | 26.11.2021 | 45  | 5  | 40  | 27  | 13 | 11 | 2 |
| 85  | Jamaica       | 26.11.2021 | 0   | 0  | 0   | 0   | 0  | 0  | 0 |
| 86  | Japan         | 26.11.2021 | 132 | 27 | 105 | 101 | 4  | 2  | 2 |
| 87  | Jordan        | 26.11.2021 | 5   | 0  | 5   | 4   | 1  | 1  | 0 |
| 88  | Kazakhstan    | 26.11.2021 | 0   | 0  | 0   | 0   | 0  | 0  | 0 |
| 89  | Kenya         | 26.11.2021 | 0   | 0  | 0   | 0   | 0  | 0  | 0 |
| 90  | Kiribati      | 26.11.2021 | 0   | 0  | 0   | 0   | 0  | 0  | 0 |
| 91  | Kuwait        | 26.11.2021 | 2   | 1  | 1   | 1   | 0  | 0  | 0 |
| 92  | Kyrgyzstan    | 26.11.2021 | 0   | 0  | 0   | 0   | 0  | 0  | 0 |
| 93  | Laos          | 26.11.2021 | 0   | 0  | 0   | 0   | 0  | 0  | 0 |
| 94  | Latvia        | 26.11.2021 | 0   | 0  | 0   | 0   | 0  | 0  | 0 |
| 95  | Lebanon       | 26.11.2021 | 4   | 0  | 4   | 4   | 0  | 0  | 0 |
| 96  | Lesotho       | 26.11.2021 | 0   | 0  | 0   | 0   | 0  | 0  | 0 |
| 97  | Liberia       | 26.11.2021 | 0   | 0  | 0   | 0   | 0  | 0  | 0 |
| 98  | Libya         | 26.11.2021 | 0   | 0  | 0   | 0   | 0  | 0  | 0 |
| 99  | Liechtenstein | 26.11.2021 | 0   | 0  | 0   | 0   | 0  | 0  | 0 |
| 100 | Lithuania     | 26.11.2021 | 0   | 0  | 0   | 0   | 0  | 0  | 0 |
| 101 | Luxembourg    | 26.11.2021 | 0   | 0  | 0   | 0   | 0  | 0  | 0 |
| 102 | Madagascar    | 26.11.2021 | 0   | 0  | 0   | 0   | 0  | 0  | 0 |

|     |                          |            |    |   |    |    |   |   |   |
|-----|--------------------------|------------|----|---|----|----|---|---|---|
| 103 | Malawi                   | 26.11.2021 | 3  | 1 | 2  | 1  | 1 | 1 | 0 |
| 104 | Malaysia                 | 26.11.2021 | 5  | 1 | 4  | 1  | 3 | 2 | 1 |
| 105 | Maldives                 | 26.11.2021 | 0  | 0 | 0  | 0  | 0 | 0 | 0 |
| 106 | Mali                     | 26.11.2021 | 0  | 0 | 0  | 0  | 0 | 0 | 0 |
| 107 | Malta                    | 26.11.2021 | 0  | 0 | 0  | 0  | 0 | 0 | 0 |
| 108 | Marshall Islands         | 26.11.2021 | 0  | 0 | 0  | 0  | 0 | 0 | 0 |
| 109 | Mauritania               | 26.11.2021 | 0  | 0 | 0  | 0  | 0 | 0 | 0 |
| 110 | Mauritius                | 26.11.2021 | 0  | 0 | 0  | 0  | 0 | 0 | 0 |
| 111 | Mexico                   | 26.11.2021 | 9  | 1 | 8  | 7  | 1 | 1 | 0 |
| 112 | Micronesia               | 26.11.2021 | 0  | 0 | 0  | 0  | 0 | 0 | 0 |
| 113 | Moldova                  | 26.11.2021 | 0  | 0 | 0  | 0  | 0 | 0 | 0 |
| 114 | Monaco                   | 26.11.2021 | 0  | 0 | 0  | 0  | 0 | 0 | 0 |
| 115 | Mongolia                 | 26.11.2021 | 5  | 2 | 3  | 1  | 2 | 1 | 1 |
| 116 | Montenegro               | 26.11.2021 | 1  | 0 | 1  | 1  | 0 | 0 | 0 |
| 117 | Morocco                  | 26.11.2021 | 0  | 0 | 0  | 0  | 0 | 0 | 0 |
| 118 | Mozambique               | 26.11.2021 | 0  | 0 | 0  | 0  | 0 | 0 | 0 |
| 119 | Myanmar (formerly Burma) | 26.11.2021 | 1  | 0 | 1  | 1  | 0 | 0 | 0 |
| 120 | Namibia                  | 26.11.2021 | 0  | 0 | 0  | 0  | 0 | 0 | 0 |
| 121 | Nauru                    | 26.11.2021 | 0  | 0 | 0  | 0  | 0 | 0 | 0 |
| 122 | Nepal                    | 26.11.2021 | 3  | 1 | 2  | 2  | 0 | 0 | 0 |
| 123 | Netherlands              | 26.11.2021 | 50 | 7 | 43 | 38 | 5 | 2 | 3 |
| 124 | New Zealand              | 26.11.2021 | 17 | 3 | 14 | 14 | 0 | 0 | 0 |
| 125 | Nicaragua                | 26.11.2021 | 0  | 0 | 0  | 0  | 0 | 0 | 0 |
| 126 | Niger                    | 26.11.2021 | 0  | 0 | 0  | 0  | 0 | 0 | 0 |
| 127 | Nigeria                  | 26.11.2021 | 2  | 0 | 2  | 2  | 0 | 0 | 0 |
| 128 | North Korea              | 26.11.2021 | 0  | 0 | 0  | 0  | 0 | 0 | 0 |



|     |                                  |            |    |   |    |    |   |   |   |
|-----|----------------------------------|------------|----|---|----|----|---|---|---|
| 129 | North Macedonia                  | 26.11.2021 | 0  | 0 | 0  | 0  | 0 | 0 | 0 |
| 130 | Norway                           | 26.11.2021 | 49 | 5 | 44 | 36 | 8 | 5 | 3 |
| 131 | Oman                             | 26.11.2021 | 0  | 0 | 0  | 0  | 0 | 0 | 0 |
| 132 | Pakistan                         | 26.11.2021 | 5  | 1 | 4  | 4  | 0 | 0 | 0 |
| 133 | Palau                            | 26.11.2021 | 0  | 0 | 0  | 0  | 0 | 0 | 0 |
| 134 | Palestine State                  | 26.11.2021 | 0  | 0 | 0  | 0  | 0 | 0 | 0 |
| 135 | Panama                           | 26.11.2021 | 0  | 0 | 0  | 0  | 0 | 0 | 0 |
| 136 | Papua New Guinea                 | 26.11.2021 | 0  | 0 | 0  | 0  | 0 | 0 | 0 |
| 137 | Paraguay                         | 26.11.2021 | 0  | 0 | 0  | 0  | 0 | 0 | 0 |
| 138 | Peru                             | 26.11.2021 | 0  | 0 | 0  | 0  | 0 | 0 | 0 |
| 139 | Philippines                      | 27.11.2021 | 2  | 1 | 1  | 1  | 0 | 0 | 0 |
| 140 | Poland                           | 27.11.2021 | 25 | 4 | 21 | 17 | 4 | 4 | 0 |
| 141 | Portugal                         | 27.11.2021 | 7  | 1 | 6  | 6  | 0 | 0 | 0 |
| 142 | Qatar                            | 27.11.2021 | 3  | 0 | 3  | 3  | 0 | 0 | 0 |
| 143 | Romania                          | 27.11.2021 | 9  | 2 | 7  | 3  | 4 | 2 | 2 |
| 144 | Russia                           | 27.11.2021 | 8  | 1 | 7  | 7  | 0 | 0 | 0 |
| 145 | Rwanda                           | 27.11.2021 | 0  | 0 | 0  | 0  | 0 | 0 | 0 |
| 146 | Saint Kitts and Nevis            | 27.11.2021 | 0  | 0 | 0  | 0  | 0 | 0 | 0 |
| 147 | Saint Lucia                      | 27.11.2021 | 0  | 0 | 0  | 0  | 0 | 0 | 0 |
| 148 | Saint Vincent and the Grenadines | 27.11.2021 | 0  | 0 | 0  | 0  | 0 | 0 | 0 |
| 149 | Samoa                            | 27.11.2021 | 0  | 0 | 0  | 0  | 0 | 0 | 0 |
| 150 | San Marino                       | 27.11.2021 | 0  | 0 | 0  | 0  | 0 | 0 | 0 |
| 151 | Sao Tome and Principe            | 27.11.2021 | 0  | 0 | 0  | 0  | 0 | 0 | 0 |
| 152 | Saudi Arabia                     | 27.11.2021 | 19 | 4 | 15 | 9  | 6 | 6 | 0 |
| 153 | Senegal                          | 27.11.2021 | 0  | 0 | 0  | 0  | 0 | 0 | 0 |
| 154 | Serbia                           | 27.11.2021 | 1  | 0 | 1  | 1  | 0 | 0 | 0 |

|     |                     |            |    |   |    |    |   |   |   |
|-----|---------------------|------------|----|---|----|----|---|---|---|
| 155 | Seychelles          | 27.11.2021 | 0  | 0 | 0  | 0  | 0 | 0 | 0 |
| 156 | Sierra Leone        | 27.11.2021 | 0  | 0 | 0  | 0  | 0 | 0 | 0 |
| 157 | Singapore           | 27.11.2021 | 10 | 3 | 7  | 5  | 2 | 1 | 1 |
| 158 | Slovakia            | 27.11.2021 | 15 | 3 | 12 | 10 | 2 | 1 | 1 |
| 159 | Slovenia            | 27.11.2021 | 3  | 1 | 2  | 0  | 2 | 0 | 2 |
| 160 | Solomon Islands     | 27.11.2021 | 0  | 0 | 0  | 0  | 0 | 0 | 0 |
| 161 | Somalia             | 27.11.2021 | 0  | 0 | 0  | 0  | 0 | 0 | 0 |
| 162 | South Africa        | 27.11.2021 | 12 | 2 | 10 | 10 | 0 | 0 | 0 |
| 163 | South Korea         | 27.11.2021 | 11 | 1 | 10 | 10 | 0 | 0 | 0 |
| 164 | South Sudan         | 27.11.2021 | 0  | 0 | 0  | 0  | 0 | 0 | 0 |
| 165 | Spain               | 27.11.2021 | 29 | 1 | 28 | 25 | 3 | 3 | 0 |
| 166 | Sri Lanka           | 27.11.2021 | 0  | 0 | 0  | 0  | 0 | 0 | 0 |
| 167 | Sudan               | 27.11.2021 | 0  | 0 | 0  | 0  | 0 | 0 | 0 |
| 168 | Suriname            | 27.11.2021 | 0  | 0 | 0  | 0  | 0 | 0 | 0 |
| 169 | Sweden              | 27.11.2021 | 27 | 6 | 21 | 18 | 3 | 1 | 2 |
| 170 | Switzerland         | 27.11.2021 | 38 | 5 | 33 | 31 | 2 | 1 | 1 |
| 171 | Syria               | 27.11.2021 | 0  | 0 | 0  | 0  | 0 | 0 | 0 |
| 172 | Tajikistan          | 27.11.2021 | 0  | 0 | 0  | 0  | 0 | 0 | 0 |
| 173 | Tanzania            | 27.11.2021 | 0  | 0 | 0  | 0  | 0 | 0 | 0 |
| 174 | Thailand            | 27.11.2021 | 7  | 1 | 6  | 4  | 2 | 0 | 2 |
| 175 | Timor-Leste         | 27.11.2021 | 0  | 0 | 0  | 0  | 0 | 0 | 0 |
| 176 | Togo                | 27.11.2021 | 1  | 0 | 1  | 1  | 0 | 0 | 0 |
| 177 | Tonga               | 27.11.2021 | 0  | 0 | 0  | 0  | 0 | 0 | 0 |
| 178 | Trinidad and Tobago | 27.11.2021 | 0  | 0 | 0  | 0  | 0 | 0 | 0 |
| 179 | Tunisia             | 27.11.2021 | 0  | 0 | 0  | 0  | 0 | 0 | 0 |
| 180 | Turkey              | 27.11.2021 | 65 | 7 | 58 | 49 | 9 | 5 | 4 |
| 181 | Turkmenistan        | 27.11.2021 | 0  | 0 | 0  | 0  | 0 | 0 | 0 |

|     |                          |            |                  |            |             |             |            |            |           |
|-----|--------------------------|------------|------------------|------------|-------------|-------------|------------|------------|-----------|
| 182 | Tuvalu                   | 27.11.2021 | 0                | 0          | 0           | 0           | 0          | 0          | 0         |
| 183 | Uganda                   | 27.11.2021 | 0                | 0          | 0           | 0           | 0          | 0          | 0         |
| 184 | Ukraine                  | 27.11.2021 | 1                | 0          | 1           | 1           | 0          | 0          | 0         |
| 185 | United Arab Emirates     | 27.11.2021 | 3                | 1          | 2           | 0           | 2          | 1          | 1         |
| 186 | United Kingdom           | 27.11.2021 | 231              | 52         | 179         | 155         | 24         | 13         | 11        |
| 187 | United States of America | 27.11.2021 | 349              | 38         | 311         | 304         | 7          | 5          | 2         |
| 188 | Uruguay                  | 27.11.2021 | 1                | 0          | 1           | 1           | 0          | 0          | 0         |
| 189 | Uzbekistan               | 27.11.2021 | 0                | 0          | 0           | 0           | 0          | 0          | 0         |
| 190 | Vanuatu                  | 27.11.2021 | 0                | 0          | 0           | 0           | 0          | 0          | 0         |
| 191 | Venezuela                | 27.11.2021 | 0                | 0          | 0           | 0           | 0          | 0          | 0         |
| 192 | Vietnam                  | 27.11.2021 | 0                | 0          | 0           | 0           | 0          | 0          | 0         |
| 193 | Yemen                    | 27.11.2021 | 0                | 0          | 0           | 0           | 0          | 0          | 0         |
| 194 | Zambia                   | 27.11.2021 | 0                | 0          | 0           | 0           | 0          | 0          | 0         |
| 195 | Zimbabwe                 | 27.11.2021 | 2                | 1          | 1           | 1           | 0          | 0          | 0         |
|     | <b>TOTAL</b>             |            | <b>189<br/>9</b> | <b>270</b> | <b>1629</b> | <b>1426</b> | <b>203</b> | <b>127</b> | <b>76</b> |

**eTable 2.** Background Characteristics of the Included Studies

|                       | N  | %  |
|-----------------------|----|----|
| Screening method      |    |    |
| Clinical              | 15 | 19 |
| Selective US          | 29 | 39 |
| Universal US          | 32 | 42 |
| Geographical location |    |    |
| Europe                | 45 | 59 |
| Asia                  | 21 | 28 |
| Australia and Oceania | 6  | 8  |
| North America         | 3  | 4  |
| South America         | 1  | 1  |
| Africa                | 0  | 0  |
| Study design          |    |    |
| Register              | 16 | 21 |
| Hospital              | 60 | 79 |
| Follow-up             |    |    |
| Prospective           | 33 | 43 |
| Retrospective         | 43 | 57 |

**eTable 3.** Risk of Bias Assessment of the Individual Studies Based on the Joanna Briggs Institute Critical Appraisal Tool for Prevalence Studies

| #  | 1st author       | year | Was the sample frame appropriate to address the target population? | Were study participants sampled in an appropriate way? | Was the sample size adequate? | Were the study subjects and the setting described in detail? | Was the data analysis conducted with sufficient coverage of the identified sample? | Were valid methods used for the identification of the condition? | Was the condition measured in a standard, reliable way for all participants? | Was there appropriate statistical analysis? | Was the response rate adequate, and if not, was the low response rate managed appropriately? | Overall |
|----|------------------|------|--------------------------------------------------------------------|--------------------------------------------------------|-------------------------------|--------------------------------------------------------------|------------------------------------------------------------------------------------|------------------------------------------------------------------|------------------------------------------------------------------------------|---------------------------------------------|----------------------------------------------------------------------------------------------|---------|
| 1  | Ang              | 1997 | yes                                                                | yes                                                    | yes                           | yes                                                          | yes                                                                                | yes                                                              | yes                                                                          | yes                                         | Not applicable                                                                               | Include |
| 2  | Arti             | 2013 | yes                                                                | yes                                                    | yes                           | yes                                                          | yes                                                                                | yes                                                              | yes                                                                          | yes                                         | Not applicable                                                                               | Include |
| 3  | Azzopardi        | 2017 | yes                                                                | yes                                                    | yes                           | yes                                                          | yes                                                                                | unclear                                                          | unclear                                                                      | yes                                         | Not applicable                                                                               | Include |
| 4  | Bache            | 2003 | yes                                                                | yes                                                    | yes                           | yes                                                          | yes                                                                                | yes                                                              | yes                                                                          | yes                                         | Not applicable                                                                               | Include |
| 5  | Barik            | 2021 | yes                                                                | yes                                                    | yes                           | yes                                                          | yes                                                                                | unclear                                                          | unclear                                                                      | yes                                         | Not applicable                                                                               | Include |
| 6  | Bhalvani         | 2011 | yes                                                                | yes                                                    | no                            | yes                                                          | yes                                                                                | yes                                                              | yes                                                                          | yes                                         | Not applicable                                                                               | Include |
| 7  | Bialik           | 1997 | yes                                                                | yes                                                    | no                            | yes                                                          | yes                                                                                | yes                                                              | yes                                                                          | yes                                         | Not applicable                                                                               | Include |
| 8  | Bialik           | 1999 | yes                                                                | yes                                                    | yes                           | yes                                                          | yes                                                                                | yes                                                              | yes                                                                          | yes                                         | Not applicable                                                                               | Include |
| 9  | Biedermann       | 2018 | yes                                                                | yes                                                    | yes                           | yes                                                          | yes                                                                                | yes                                                              | yes                                                                          | yes                                         | Not applicable                                                                               | Include |
| 10 | Bjerkreim        | 1987 | yes                                                                | yes                                                    | yes                           | yes                                                          | yes                                                                                | yes                                                              | unclear                                                                      | yes                                         | Not applicable                                                                               | Include |
| 11 | Boere-Boonekamp  | 1998 | yes                                                                | yes                                                    | yes                           | yes                                                          | yes                                                                                | yes                                                              | unclear                                                                      | yes                                         | Not applicable                                                                               | Include |
| 12 | Broadhurst       | 2019 | yes                                                                | yes                                                    | yes                           | yes                                                          | yes                                                                                | unclear                                                          | unclear                                                                      | yes                                         | Not applicable                                                                               | Include |
| 13 | Buonsenso        | 2021 | yes                                                                | yes                                                    | yes                           | yes                                                          | yes                                                                                | yes                                                              | yes                                                                          | yes                                         | Not applicable                                                                               | Include |
| 14 | Burger           | 1990 | yes                                                                | yes                                                    | yes                           | yes                                                          | yes                                                                                | unclear                                                          | unclear                                                                      | yes                                         | Not applicable                                                                               | Include |
| 15 | Cekic            | 2015 | yes                                                                | yes                                                    | yes                           | yes                                                          | yes                                                                                | yes                                                              | yes                                                                          | yes                                         | Not applicable                                                                               | Include |
| 16 | Chotigavanichaya | 2012 | yes                                                                | yes                                                    | yes                           | unclear                                                      | yes                                                                                | unclear                                                          | unclear                                                                      | yes                                         | Not applicable                                                                               | Include |

|    |                |      |     |     |     |         |     |         |         |     |                |         |
|----|----------------|------|-----|-----|-----|---------|-----|---------|---------|-----|----------------|---------|
| 17 | Clarke         | 2012 | yes | yes | yes | yes     | yes | unclear | unclear | yes | Not applicable | Include |
| 18 | Colta          | 2016 | yes | yes | yes | yes     | yes | yes     | yes     | yes | Not applicable | Include |
| 19 | Degnan         | 2021 | yes | yes | yes | yes     | yes | yes     | yes     | yes | Not applicable | Include |
| 20 | De Martino     | 1994 | yes | yes | yes | no      | yes | yes     | yes     | yes | Not applicable | Include |
| 21 | Den            | 2021 | yes | yes | yes | yes     | yes | unclear | unclear | yes | Not applicable | Include |
| 22 | Donnelly       | 2015 | yes | yes | yes | yes     | yes | unclear | unclear | yes | Not applicable | Include |
| 23 | Geertsema      | 2018 | yes | yes | no  | yes     | yes | yes     | yes     | yes | Not applicable | Include |
| 24 | Gharehdaghi    | 2011 | yes | yes | yes | unclear | yes | yes     | yes     | yes | Not applicable | Include |
| 25 | Giannakopoulou | 2002 | yes | yes | yes | yes     | yes | unclear | unclear | yes | Not applicable | Include |
| 26 | Goss           | 2002 | yes | yes | yes | yes     | yes | unclear | unclear | yes | Not applicable | Include |
| 27 | Güler          | 2016 | yes | yes | yes | yes     | yes | yes     | yes     | yes | Not applicable | Include |
| 28 | Gyurkovits     | 2019 | yes | yes | yes | yes     | yes | yes     | yes     | yes | Not applicable | Include |
| 29 | Hesaraki       | 2017 | yes | yes | yes | yes     | yes | unclear | unclear | yes | Not applicable | Include |
| 30 | Ishikawa       | 2008 | yes | yes | yes | yes     | yes | yes     | yes     | yes | Not applicable | Include |
| 31 | Kamath         | 2007 | yes | yes | yes | yes     | yes | unclear | unclear | yes | Not applicable | Include |
| 32 | Kokavec        | 2007 | yes | yes | yes | yes     | yes | yes     | yes     | yes | Not applicable | Include |
| 33 | Kolb           | 2015 | yes | yes | yes | yes     | yes | yes     | yes     | yes | Not applicable | Include |
| 34 | Krolo          | 2003 | yes | yes | yes | yes     | yes | yes     | yes     | yes | Not applicable | Include |
| 35 | Kumar          | 2016 | yes | yes | yes | yes     | yes | yes     | unclear | yes | Not applicable | Include |
| 36 | Kural          | 2019 | yes | yes | yes | yes     | yes | yes     | unclear | yes | Not applicable | Include |
| 37 | Kose           | 2006 | yes | yes | yes | yes     | yes | yes     | yes     | yes | Not applicable | Include |
| 38 | Lange          | 2017 | yes | yes | yes | yes     | yes | yes     | yes     | yes | Not applicable | Include |

|    |            |      |     |     |     |     |     |         |         |     |                |         |
|----|------------|------|-----|-----|-----|-----|-----|---------|---------|-----|----------------|---------|
| 39 | Lisle      | 2012 | yes | yes | yes | no  | yes | unclear | unclear | yes | Not applicable | Include |
| 40 | Mamouri    | 2003 | yes | yes | yes | yes | yes | unclear | unclear | yes | Not applicable | Include |
| 41 | Maxwell    | 2002 | yes | yes | yes | yes | yes | unclear | unclear | yes | Not applicable | Include |
| 42 | McAllister | 2018 | yes | yes | yes | yes | yes | yes     | unclear | yes | Not applicable | Include |
| 43 | Milligan   | 2020 | yes | yes | yes | yes | yes | yes     | yes     | yes | Not applicable | Include |
| 44 | Moosa      | 2009 | yes | yes | yes | yes | yes | unclear | unclear | yes | Not applicable | Include |
| 45 | Munkhuu    | 2013 | yes | yes | yes | yes | yes | yes     | yes     | yes | Not applicable | Include |
| 46 | Muresan    | 2019 | yes | yes | no  | yes | yes | yes     | yes     | yes | Not applicable | Include |
| 47 | Olsen      | 2018 | yes | yes | yes | yes | yes | yes     | yes     | yes | Not applicable | Include |
| 48 | Paton      | 2005 | yes | yes | yes | yes | yes | yes     | unclear | yes | Not applicable | Include |
| 49 | Peled      | 2008 | yes | yes | yes | yes | yes | yes     | yes     | yes | Not applicable | Include |
| 50 | Peled      | 2008 | yes | yes | yes | yes | yes | yes     | yes     | yes | Not applicable | Include |
| 51 | Phelan     | 2014 | yes | yes | yes | yes | yes | unclear | unclear | yes | Not applicable | Include |
| 52 | Pollet     | 2016 | yes | yes | yes | yes | yes | yes     | unclear | yes | Not applicable | Include |
| 53 | Puol       | 1998 | yes | yes | yes | yes | yes | yes     | yes     | yes | Not applicable | Include |
| 54 | Reidy      | 2019 | yes | yes | yes | yes | yes | unclear | unclear | yes | Not applicable | Include |
| 55 | Riboni     | 2003 | yes | yes | yes | yes | yes | yes     | yes     | yes | Not applicable | Include |
| 56 | Rosendahl  | 1996 | yes | yes | yes | yes | yes | yes     | yes     | yes | Not applicable | Include |
| 57 | Schams     | 2017 | yes | yes | yes | yes | yes | yes     | yes     | yes | Not applicable | Include |
| 58 | Sepulveda  | 2021 | yes | yes | yes | yes | yes | unclear | unclear | yes | Not applicable | Include |
| 59 | Sharpe     | 2005 | yes | yes | yes | yes | yes | unclear | unclear | yes | Not applicable | Include |
| 60 | Sirisabya  | 2019 | yes | yes | yes | yes | yes | unclear | unclear | yes | Not applicable | Include |

|    |            |      |     |     |     |         |     |         |         |     |                |         |
|----|------------|------|-----|-----|-----|---------|-----|---------|---------|-----|----------------|---------|
| 61 | Studer     | 2016 | yes | yes | yes | yes     | yes | unclear | unclear | yes | Not applicable | Include |
| 62 | Talbot     | 2017 | yes | yes | yes | yes     | yes | yes     | unclear | yes | Not applicable | Include |
| 63 | Tong       | 2011 | yes | yes | yes | unclear | yes | unclear | unclear | yes | Not applicable | Include |
| 64 | Treiber    | 2008 | yes | yes | yes | yes     | yes | yes     | yes     | yes | Not applicable | Include |
| 65 | Treiber    | 2021 | yes | yes | yes | yes     | yes | yes     | yes     | yes | Not applicable | Include |
| 66 | Tyagi      | 2016 | yes | yes | yes | yes     | yes | yes     | unclear | yes | Not applicable | Include |
| 67 | Vafae      | 2017 | yes | yes | yes | yes     | yes | yes     | yes     | yes | Not applicable | Include |
| 68 | Von Kries  | 2003 | yes | yes | yes | yes     | yes | unclear | unclear | yes | Not applicable | Include |
| 69 | Walter     | 1992 | yes | yes | yes | yes     | yes | yes     | yes     | yes | Not applicable | Include |
| 70 | Wenger     | 2013 | yes | yes | yes | yes     | yes | yes     | unclear | yes | Not applicable | Include |
| 71 | Wenger     | 2019 | yes | yes | yes | yes     | yes | yes     | yes     | yes | Not applicable | Include |
| 72 | Wilf-Miron | 2017 | yes | yes | yes | yes     | yes | yes     | yes     | yes | Not applicable | Include |
| 73 | Wirth      | 2004 | yes | yes | yes | yes     | yes | yes     | unclear | yes | Not applicable | Include |
| 74 | Woodacre   | 2016 | yes | yes | yes | yes     | yes | yes     | unclear | yes | Not applicable | Include |
| 75 | Yiv        | 1997 | yes | yes | yes | yes     | yes | yes     | yes     | yes | Not applicable | Include |
| 76 | Zenios     | 2000 | yes | yes | yes | yes     | yes | unclear | unclear | yes | Not applicable | Include |
